# Supplementary material
Source: publisher figshare collection journal article supplement (https://acs.figshare.com/ndownloader/files/3814003)
Supplement: Supplementary file 1 [file 3814003]

# Supporting Information (SI)

## Using the fluorescence red edge effect to measure the local dynamics of lyophilized sugar glasses and protein formulations, and assess long-term product stability

*Ken K. Qian<sup>1</sup>, Pawel J. Grobelny<sup>2</sup>, Madhusudan Tyagi<sup>1</sup>, and Marcus T. Cicerone<sup>1, \*</sup>*

<sup>1</sup>: National Institute of Standards and Technology, Gaithersburg, MD 20899

<sup>2</sup>: University of Connecticut, Storrs, Connecticut 06269

Derivation of Equation 8:

Using the time-resolved fluorescence method, the spectral relaxation can be described by a

Debye-type decay function,  $\Phi(t)$ :

$$\Phi(t) = \exp(-t/\tau_R) = \frac{\nu(t) - \nu(\infty)}{\nu(0) - \nu(\infty)} \quad (\text{S1})$$

where  $\nu(t)$  is the first moment average of emitted fluorescence frequency ( $\nu = c/\lambda$ ) at time  $t$ .  $\nu(0)$  and  $\nu(\infty)$  correspond respectively to the first moment averages of emitted fluorescence frequency immediately after excitation and at sufficiently long time that the excited-state solvent configuration is at equilibrium.  $\tau_R$  is the relaxation time.

The first moment average of a corresponding steady-state emission spectra ( $\bar{\nu}$ ) is given by the integral average of  $\nu(t)$  over the intensity decay:

$$\bar{\nu} = \frac{\int_0^{\infty} \nu(t) [\exp(-t/\tau_F)] dt}{\int_0^{\infty} \nu(t) dt} \quad (\text{S2})$$

where  $\tau_F$  is the fluorescence lifetime.

Substitution of Equation S1 into S2 yields:

$$\frac{\bar{\nu} - \nu(\infty)}{\nu(0) - \nu(\infty)} = \frac{\tau_R}{\tau_R + \tau_F} \quad (\text{S3})$$

Using the same formalism, we calculated the relaxation time from the red edge measurements by normalizing the spectral difference to the maximal red-edge effect at the lowest temperatures:

$$\frac{\bar{\nu}^{Main} - \bar{\nu}^{Edge}}{\bar{\nu}_0^{Main} - \bar{\nu}_0^{Edge}} = \frac{\tau_R}{\tau_R + \tau_F} \quad (\text{S4})$$

where  $\bar{\nu}^{Main}$  and  $\bar{\nu}^{Edge}$  correspond to the first moments of fluorescence signals excited at 532 nm and 566 nm at a particular temperature, respectively. The subscript “0” in  $\bar{\nu}_0^{Main}$  and  $\bar{\nu}_0^{Edge}$  denotes first moments at the lowest temperature.
